# Supplementary material for: Exploring the Binding Effects of Natural Products and Antihypertensive Drugs on SARS-CoV-2: An In Silico Investigation of Main Protease and Spike Protein
Source: MDPI journal article supplement (doi:10.3390/ijms242115894), 2023-11-02
Supplement: s1 [file s1]

# Exploring the binding effects of Natural products and Anti-hypertensives drugs on SARS-CoV-2: An *in silico* investigation of Main Protease and Spike Protein

Kalliopi Moschovou <sup>1</sup>, Maria Antoniou <sup>2,3</sup>, Eleni Chontzopoulou <sup>1</sup>, Konstantinos D. Papavasileiou <sup>2,3</sup>, Georgia Melagraki <sup>4,\*</sup>, Antreas Afantitis <sup>2,3</sup> and Thomas Mavromoustakos <sup>1</sup>

<sup>1</sup> Department of Chemistry, National and Kapodistrian University of Athens, 15771, Greece

<sup>2</sup> Department of ChemoInformatics, NovaMechanics Ltd., Nicosia 1046, Cyprus

<sup>3</sup> Department of ChemoInformatics, NovaMechanics MIKE., Piraeus, Greece

<sup>3</sup> Division of Physical Sciences & Applications, Hellenic Military Academy, 16672 Vari, Greece

\* Correspondence: georgiamelagraki@gmail.com

## Supplementary Material

**Table S1.** Binding affinities (kcal mol<sup>-1</sup>) of the compounds considered at the Mpro binding site with the Induced Fit Docking method.

| Compound            | Binding affinity |
|---------------------|------------------|
| Cannabidiolic acid  | -5.9             |
| Cannabigerolic acid | -5.4             |
| Caffeic acid        | -7.3             |
| Quercetin           | -7.8             |
| Curcumin            | -8.5             |
| Rosmarinic acid     | -9.5             |
| Salvianolic acid b  | n/d*             |
| Eprosartan          | -5.7             |
| Telmisartan         | n/d              |
| Irbesartan          | -2.9             |
| Candesartan         | -5.4             |
| Olmesartan          | n/d              |
| Valsartan           | n/d              |
| Azilsartan          | -6.7             |
| Losartan            | -6.7             |

\*n/d: no docked

## IFD Mpro - natural products

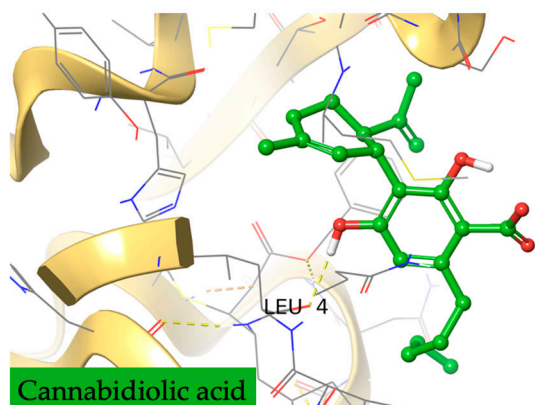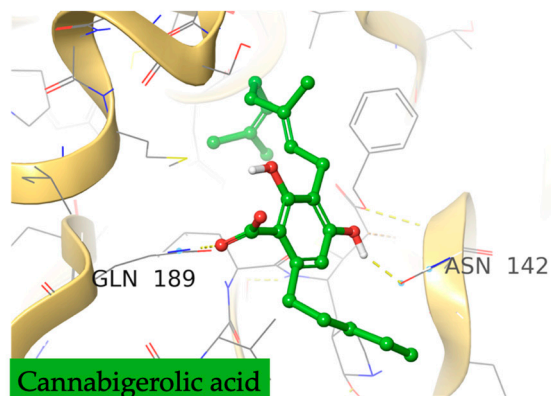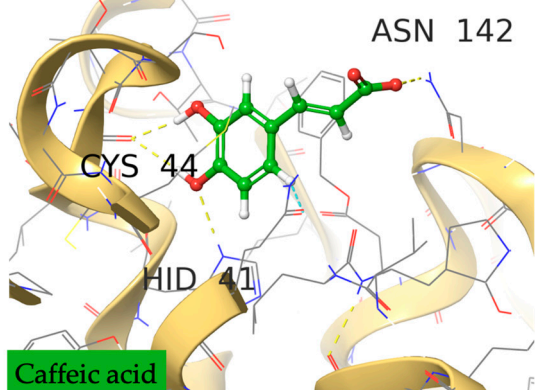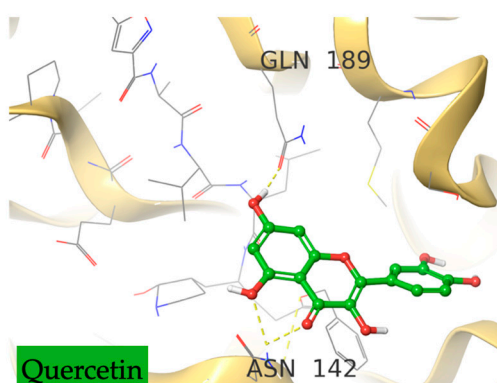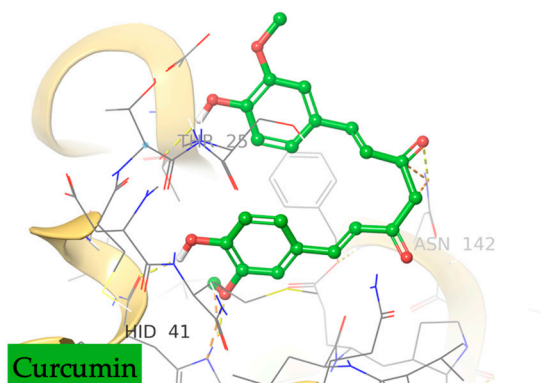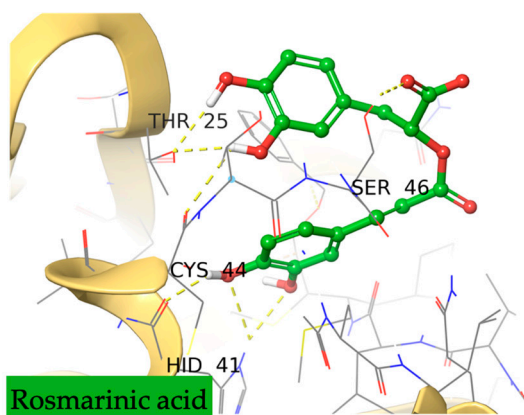

## IFD Mpro - antihypertensives

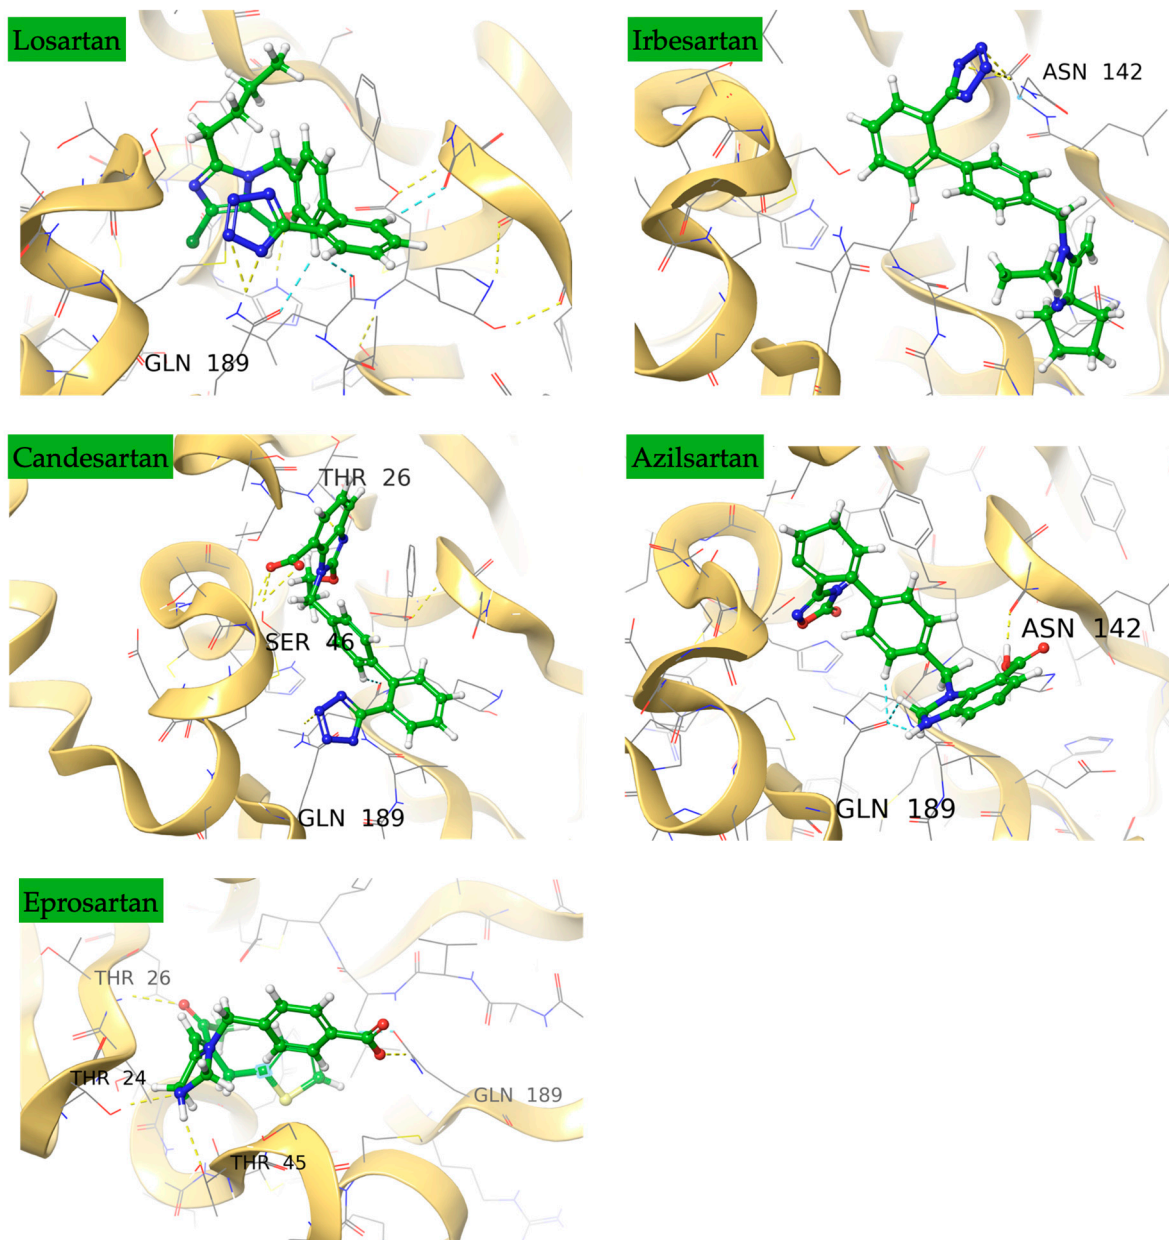

**Figure S1.** The docked poses of the “Mpro-natural products” and “Mpro-antihypertensives complexes” obtained from IFD. The Mpro is represented in yellow ribbon. Hydrogen bonds are represented by yellow dashed lines, aromatic hydrogen bonds by light blue dashes, while pi-cation interactions are depicted in green and salt bridges with magenta. The same color coding is consistently used for all figures presented.

**Table S2.** Induced Fit Docking (IFD) results for the three distinct binding sites of S protein PDB ID: 6M0J). Binding affinities are in units of kcal mol<sup>-1</sup>.

| Compound            | Binding Affinity<br>Chain E (Spike) | Binding Affinity<br>Chain A (ACE2) | Binding Affinity<br>New binding site |
|---------------------|-------------------------------------|------------------------------------|--------------------------------------|
| Cannabidiolic acid  | -4.9                                | -7.7                               | -4.0                                 |
| Cannabigerolic acid | -6.0                                | -6.9                               | -5.9                                 |
| Caffeic acid        | -7.1                                | -7.4                               | -4.7                                 |
| Quercetin           | -7.7                                | -10.4                              | -7.7                                 |
| Curcumin            | -7.3                                | -7.0                               | -6.6                                 |
| Rosmarinic acid     | -11.1                               | -9.9                               | -8.3                                 |
| Salvianolic acid B  | -14.2                               | -11.1                              | -10.0                                |
| Losartan            | -6.0                                | -7.1                               | -5.1                                 |
| Telmisartan         | -3.8                                | -8.4                               | -3.6                                 |
| Irbesartan          | -3.3                                | -3.9                               | -2.8                                 |
| Candesartan         | -3.4                                | -3.6                               | -3.4                                 |
| Olmesartan          | -7.2                                | -4.8                               | -5.0                                 |
| Valsartan           | -4.2                                | -4.4                               | -3.0                                 |
| Azilsartan          | -6.7                                | -3.5                               | -5.4                                 |
| Eprosartan          | -4.9                                | -7.1                               | -6.4                                 |



## IFD S protein - 1st binding site

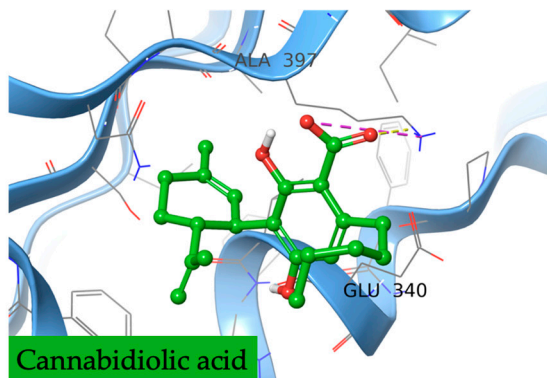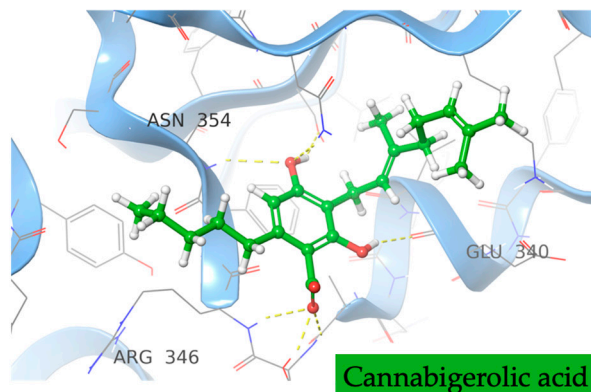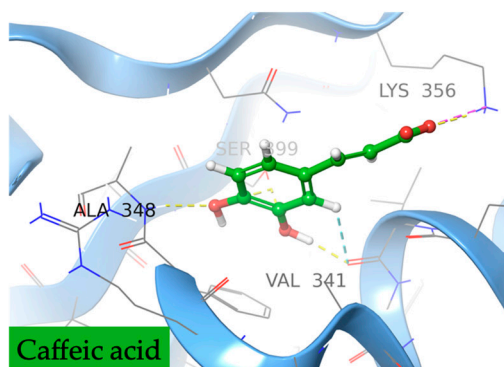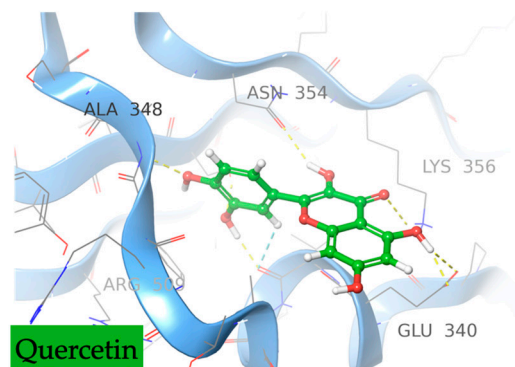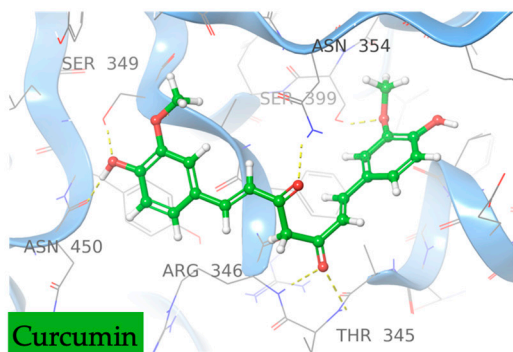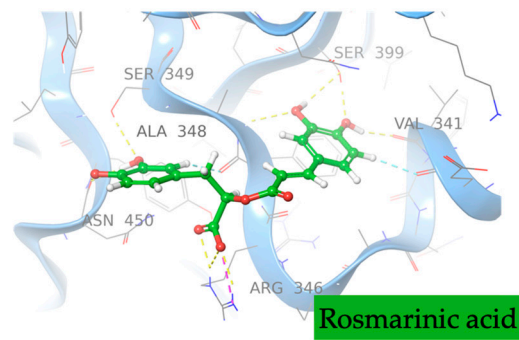

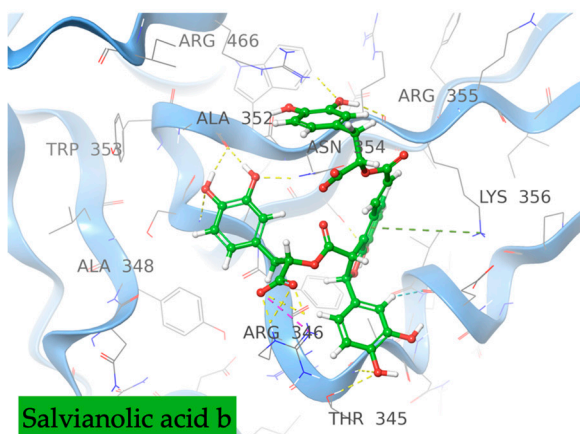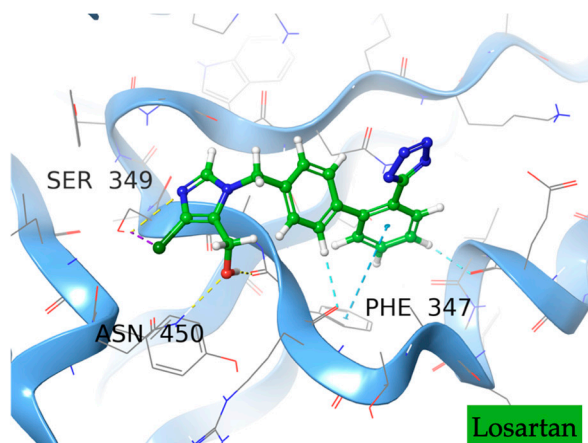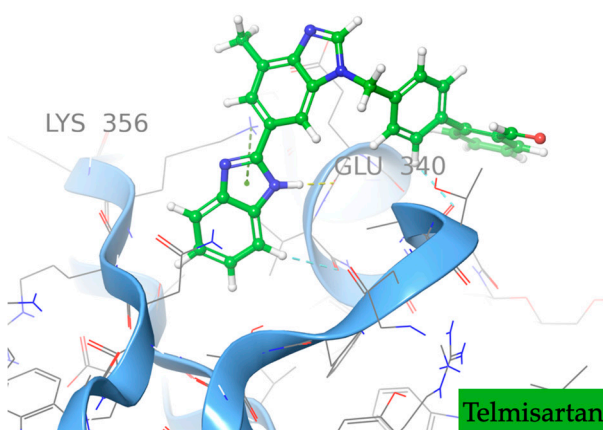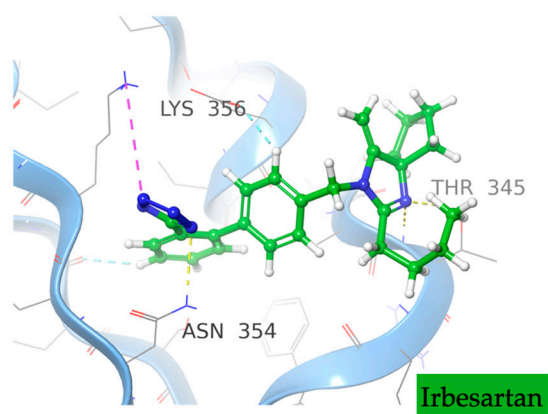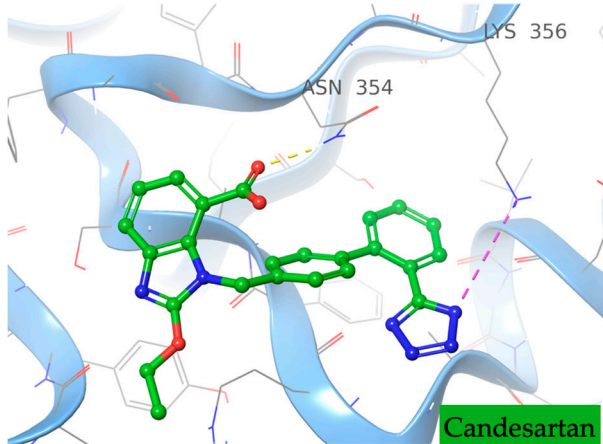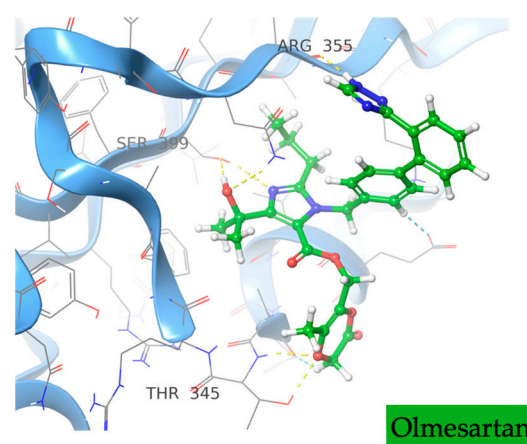

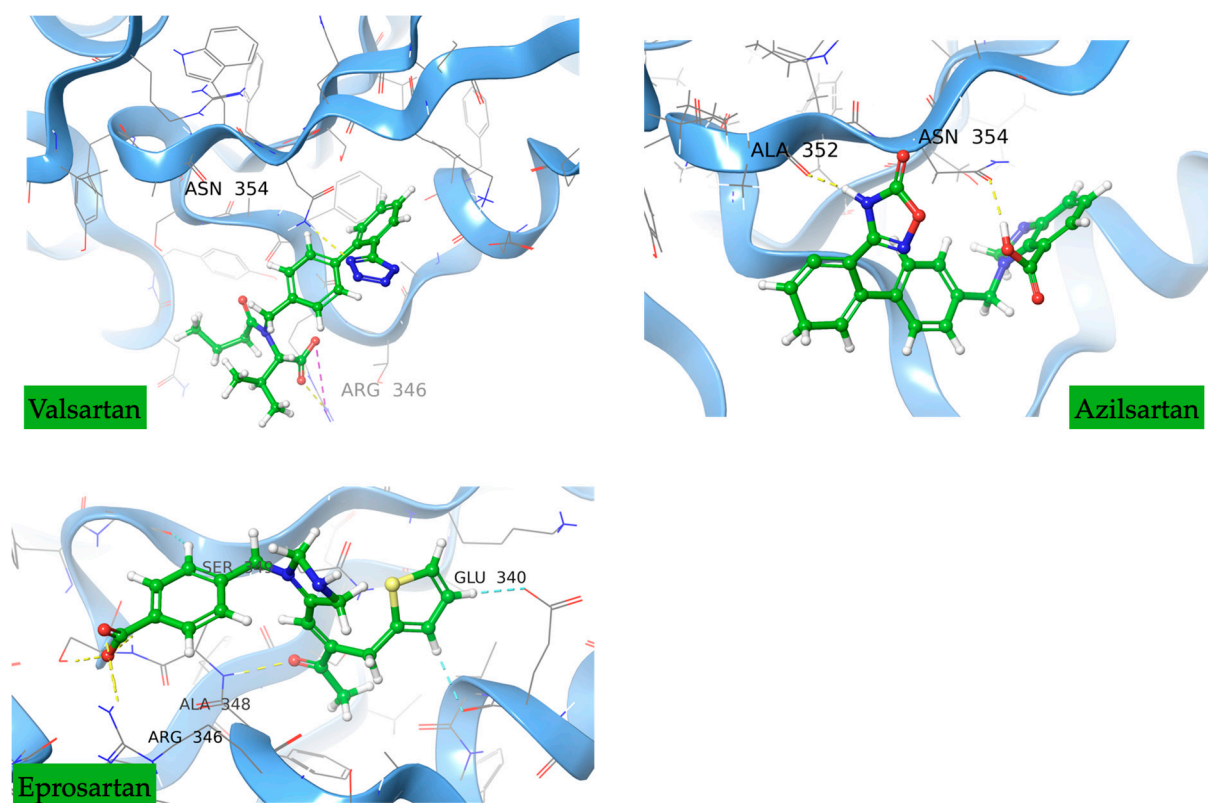

**Figure S2.** The docked poses of the “S protein-natural products” and “S protein -antihypertensives complexes” for the first binding site obtained from IFD. With light blue ribbon is represented the S protein (chain E) where the first binding site is located.

## IFD S protein - 2nd binding site

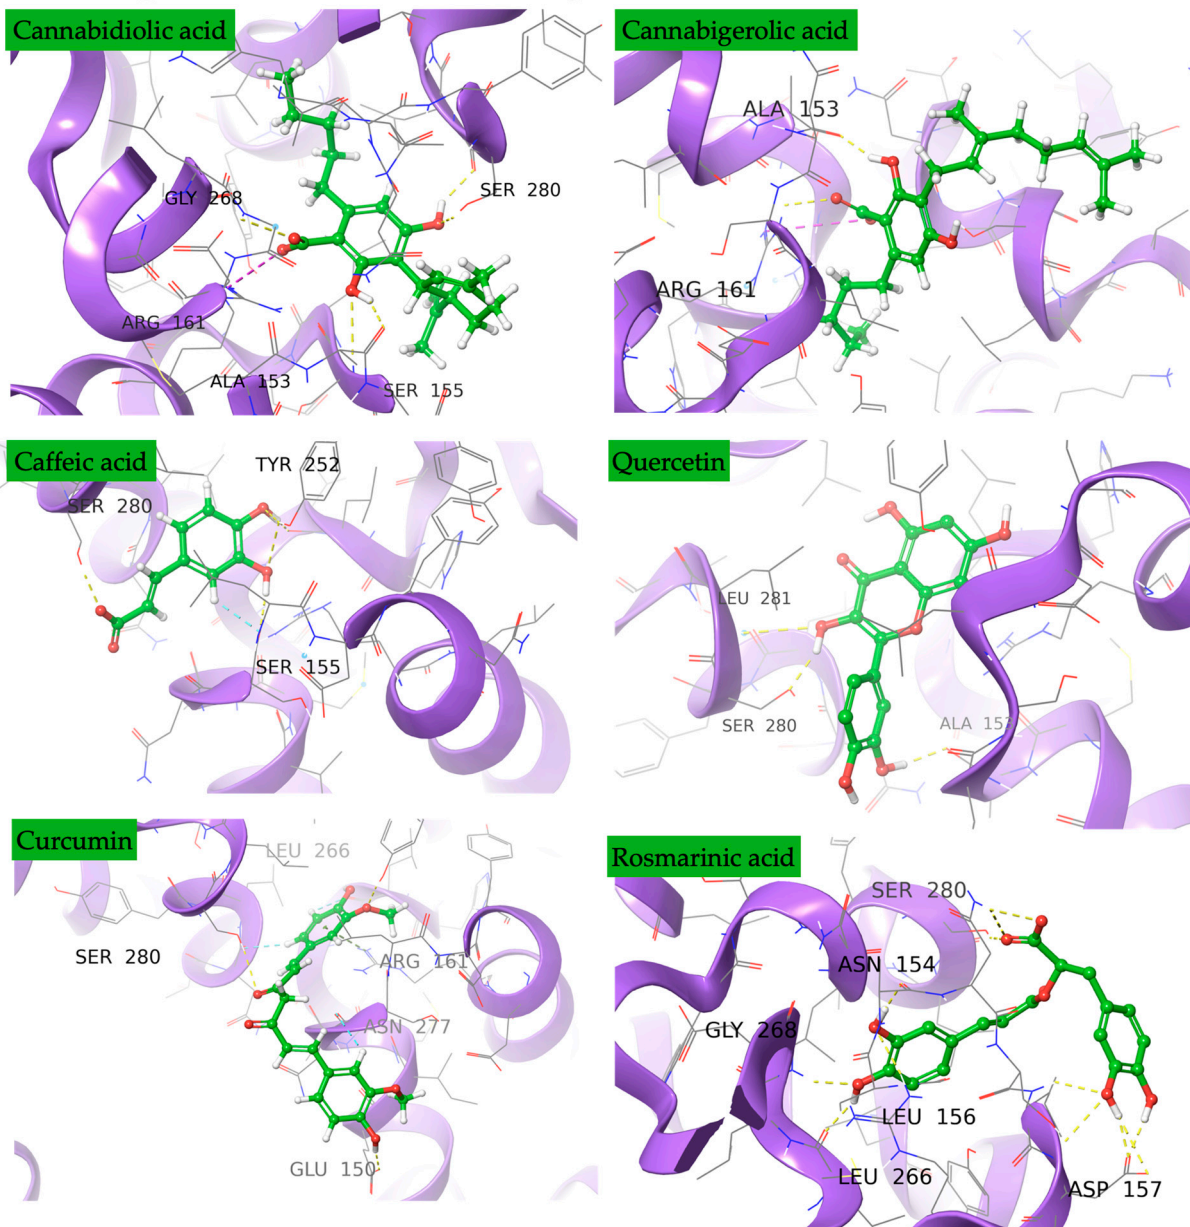



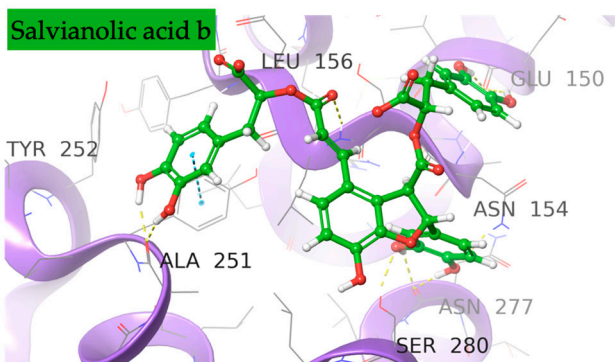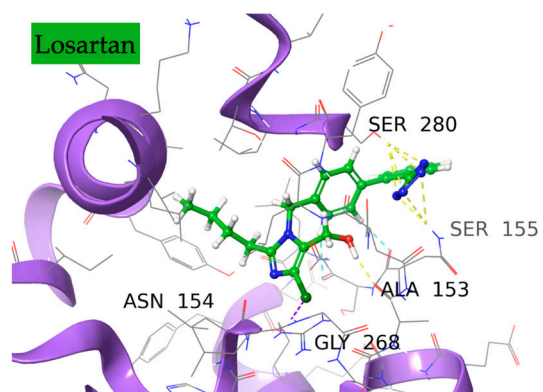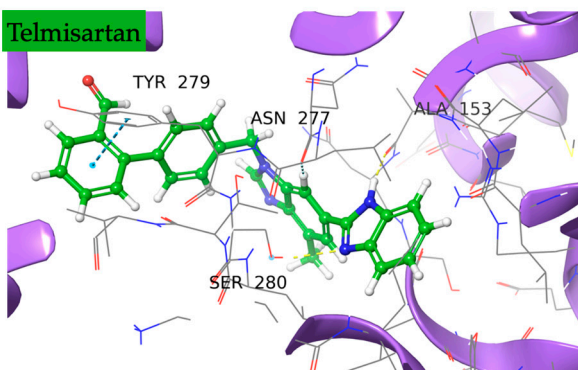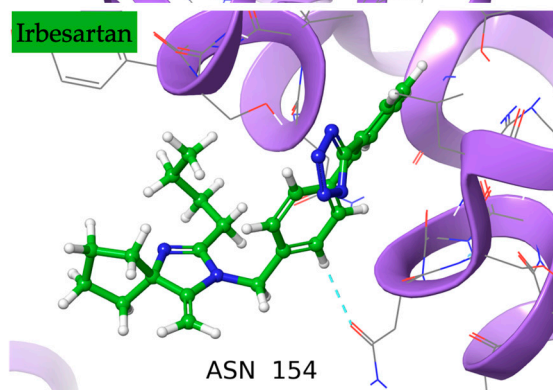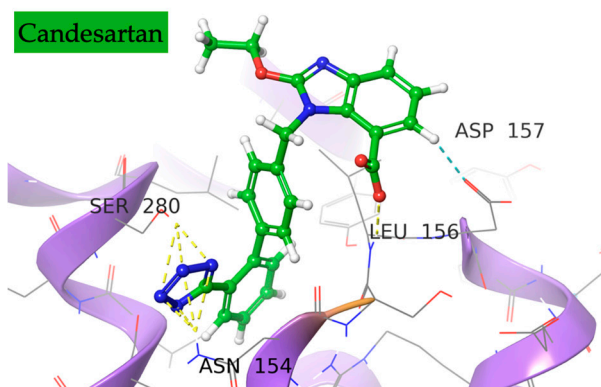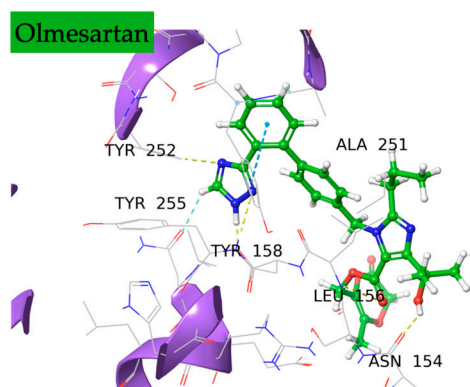

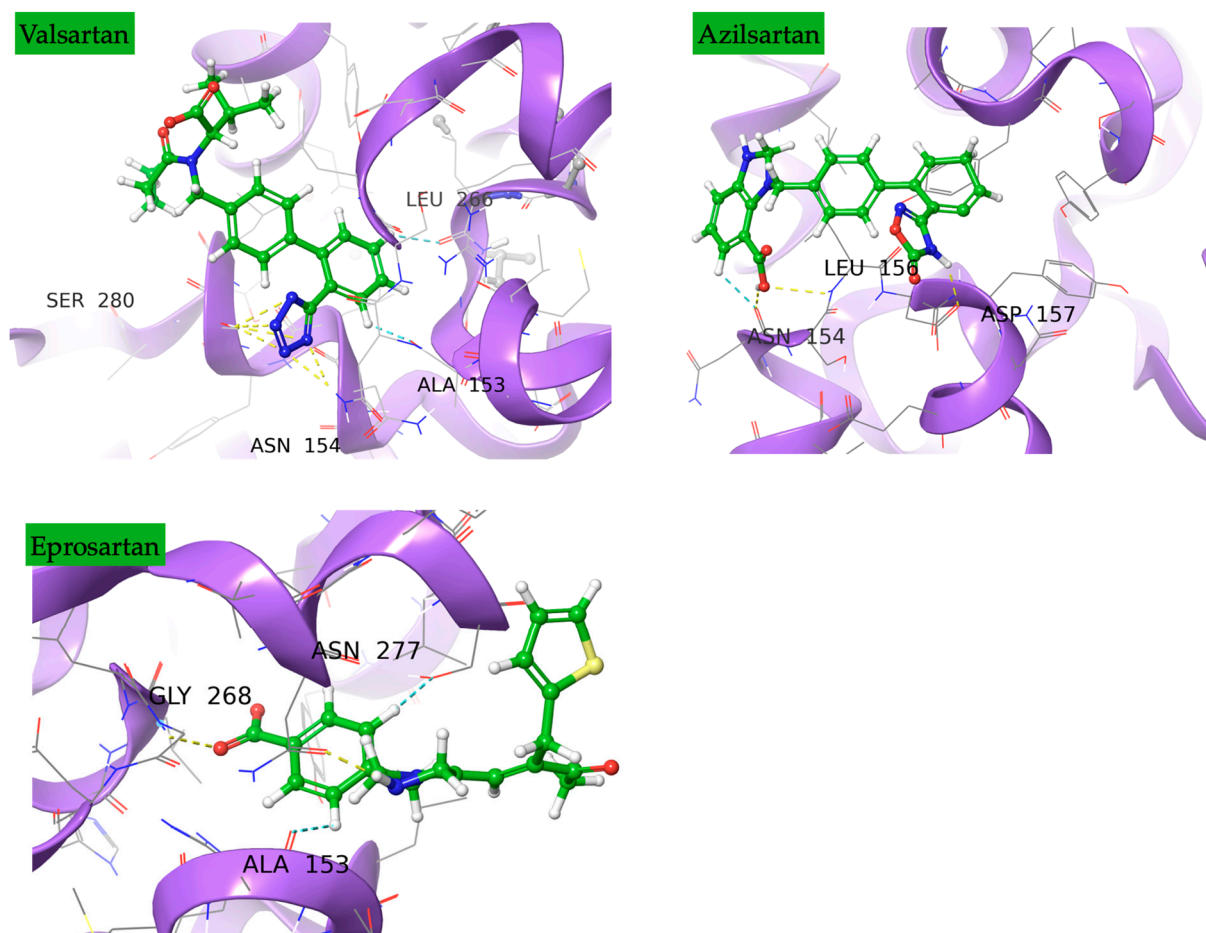

**Figure S3.** The docked poses of the complexes involving the S protein and natural products, as well as the S protein and antihypertensives, for the second binding site obtained from IFD. In the figure, the ACE2 (chain A), where the second binding site is located, is depicted with a purple ribbon.

## IFD S protein - 3rd binding site

Cannabidiolic acid

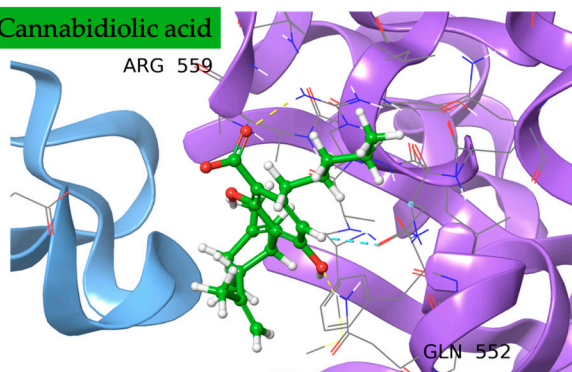

Cannabigerolic acid

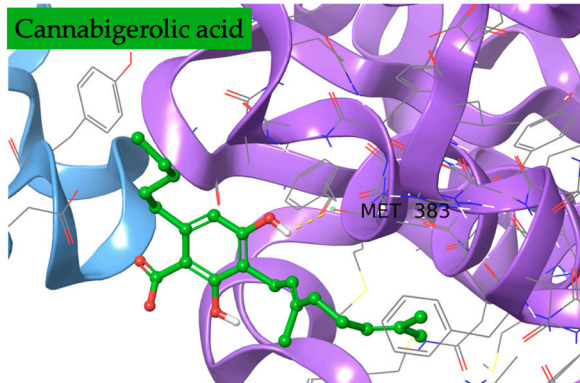

Caffeic acid

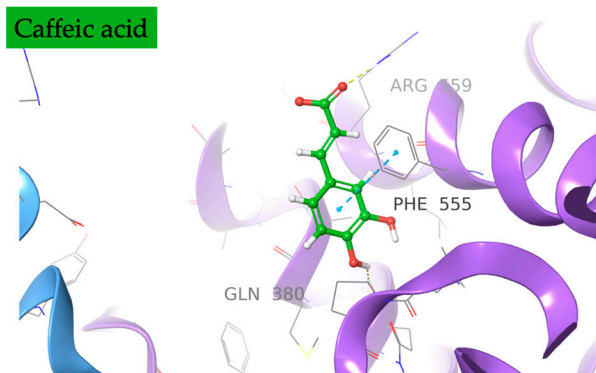

Quercetin

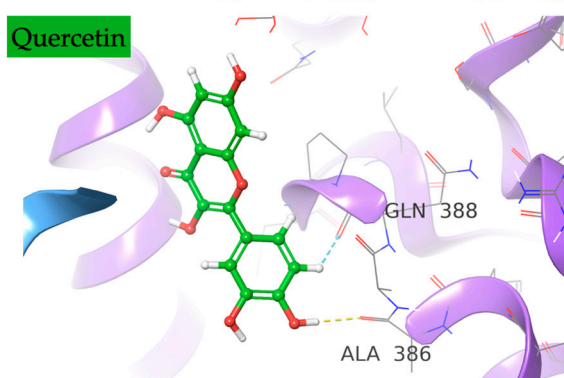

Curcumin

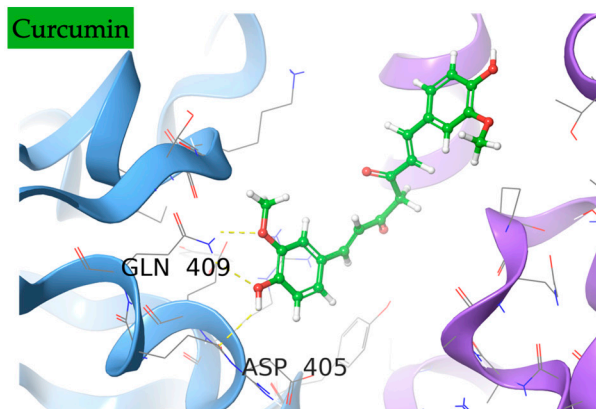

Rosmarinic acid

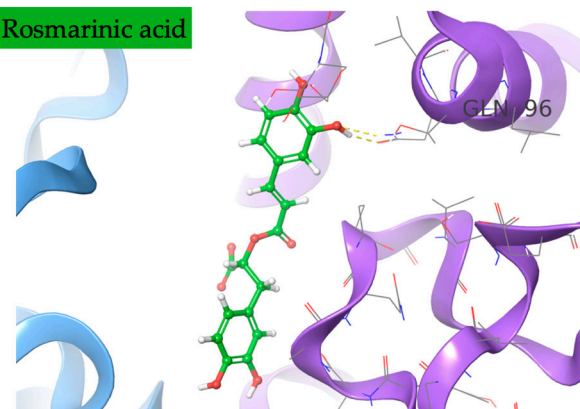



Salvianolic acid b

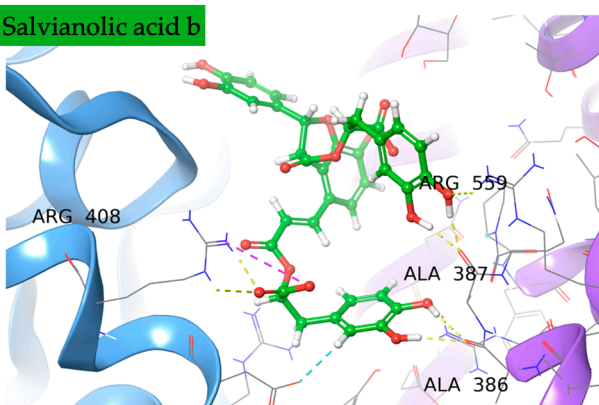

Irbesartan

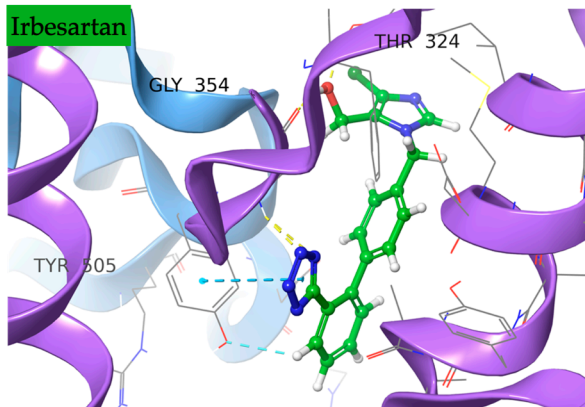

Telmisartan

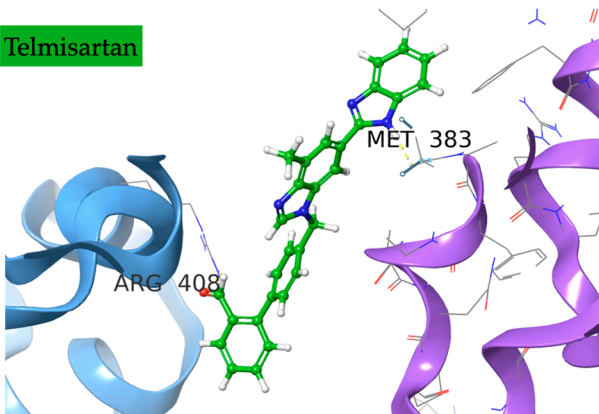

Irbesartan

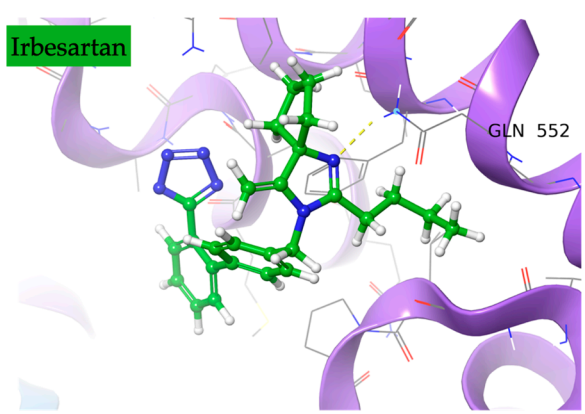

Candesartan

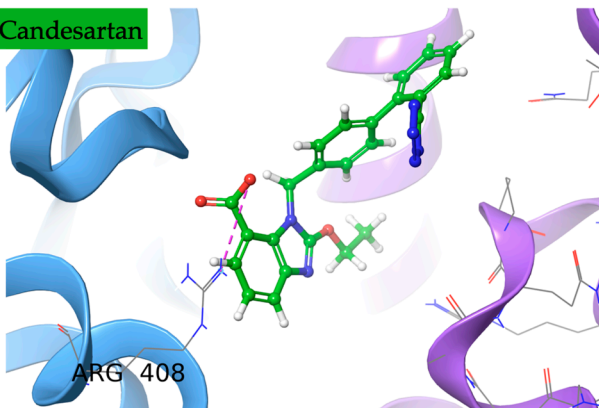

Olmesartan

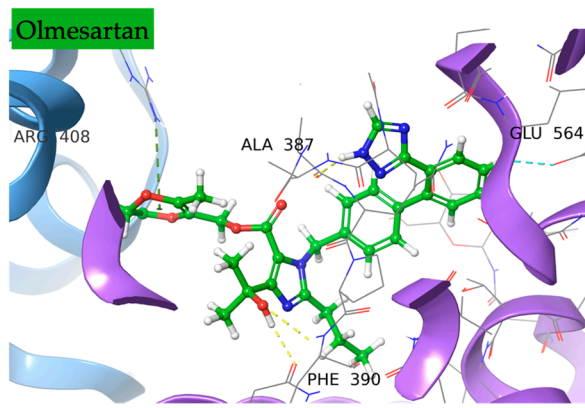

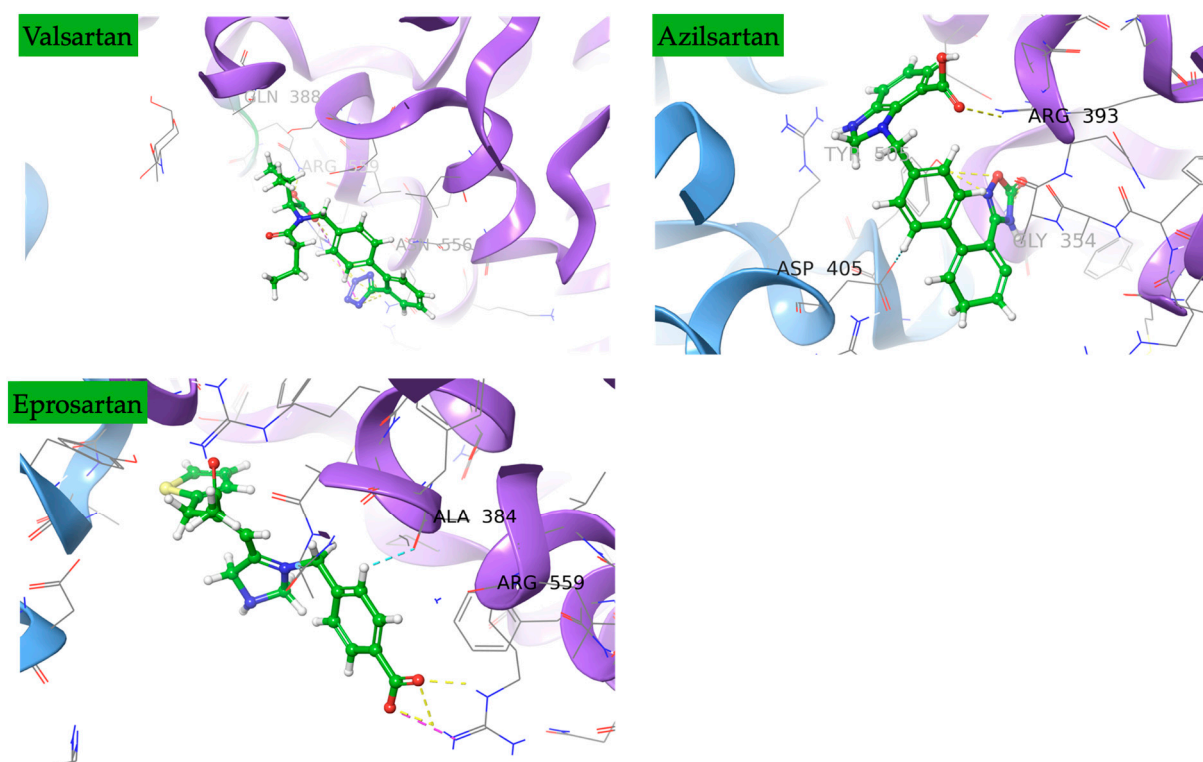

**Figure S4.** The IFD-derived docked poses of the complexes involving the S protein and natural products, as well as the S protein and antihypertensives, are presented for the third binding site. In the visualization, the ACE2 (chain A) is depicted with a purple ribbon, and the S protein (chain E) is shown in light blue. The third binding site is located at their interface.

## Mpro - natural products

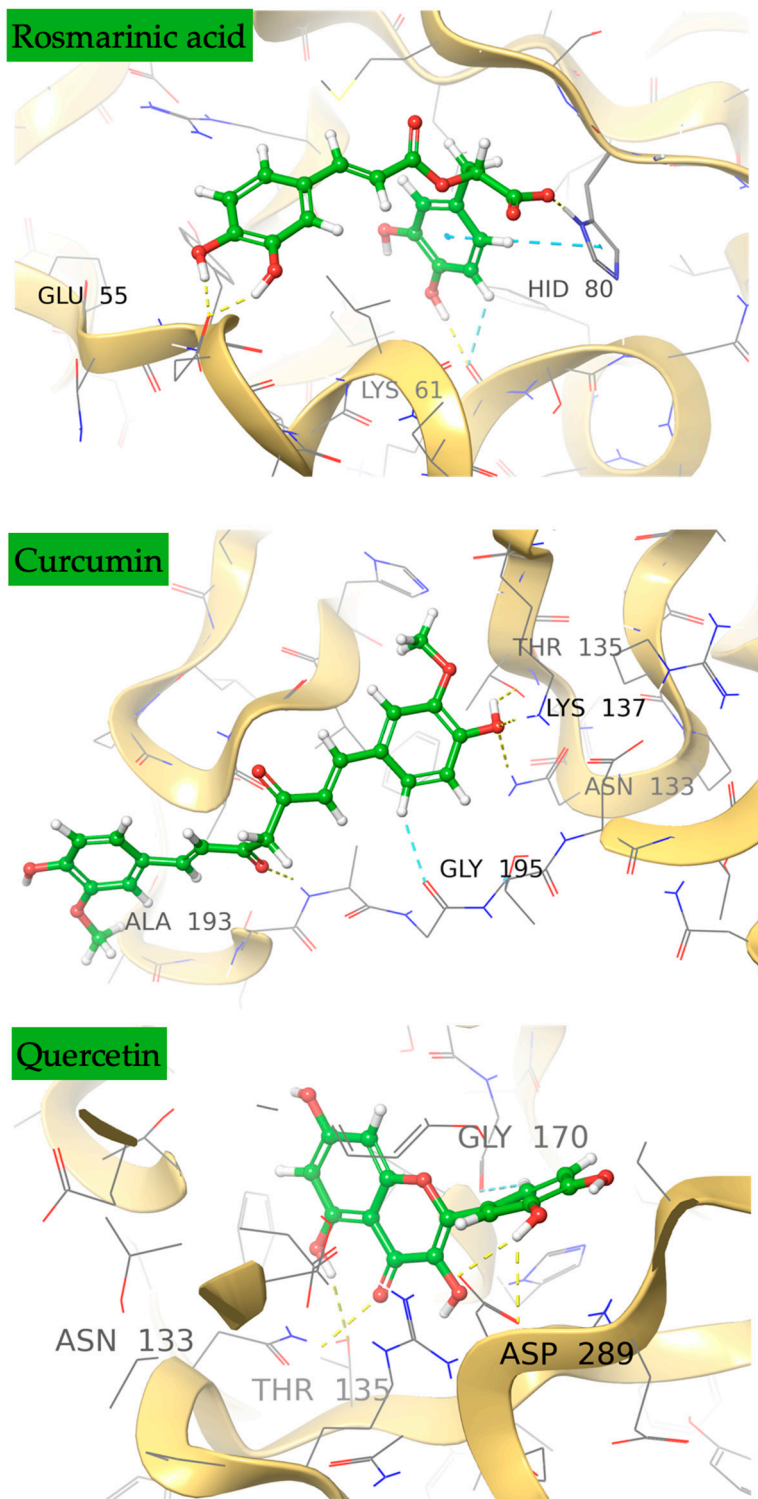

**Figure S5.** The predominant representative conformation of the Mpro – natural products complexes obtained through clustering analysis. The centroid represents 22%, 17% and 24% of the total simulation time for rosmarinic acid, curcumin and quercetin complexes, respectively.

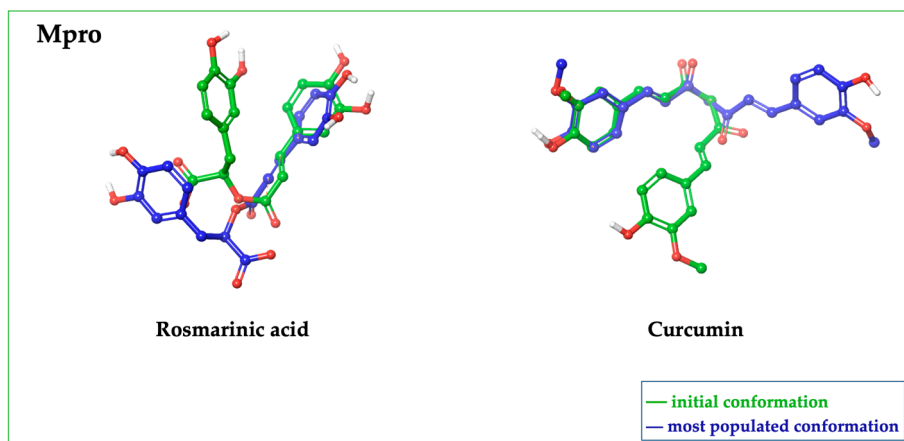

**Figure S6.** Superposition of the initial rosmarinic acid and curcumin conformation (green) derived from IFD to the Mpro with the centroid deduced from clustering analysis of the MD simulations (blue).

## S protein - 1st binding site

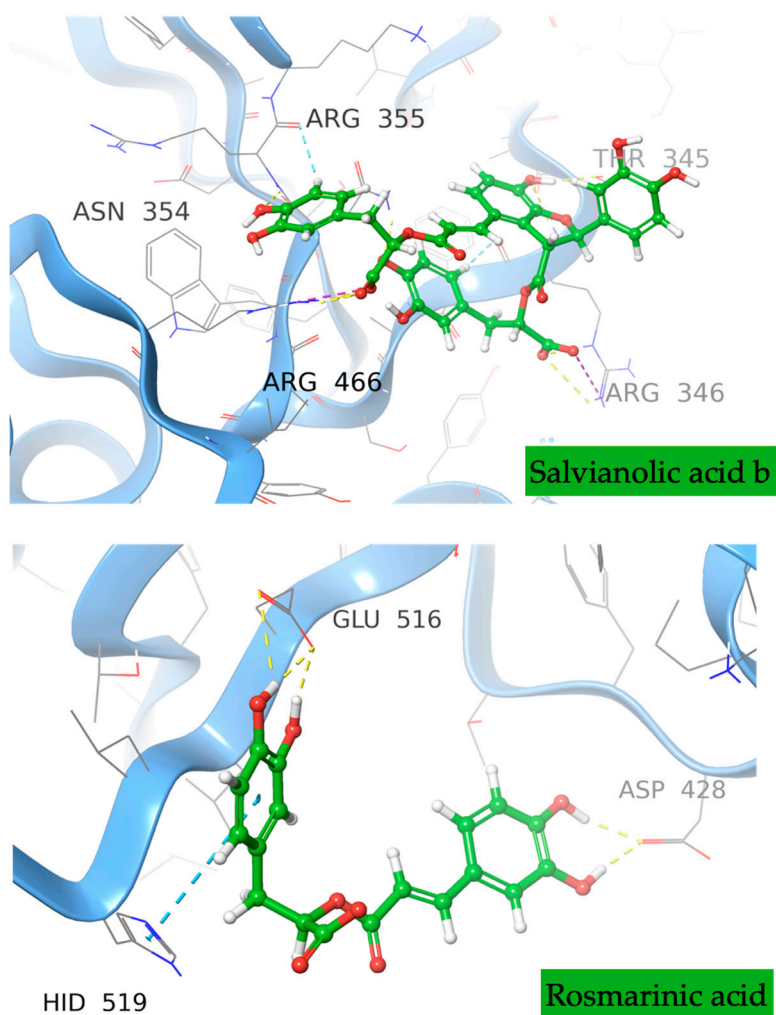

**Figure S7.** The predominant representative conformation of the S protein – natural products complexes obtained for the first binding site through clustering analysis. The centroid represents 22% and 19% of the total simulation time for salvianolic acid b and rosmarinic acid complexes, respectively

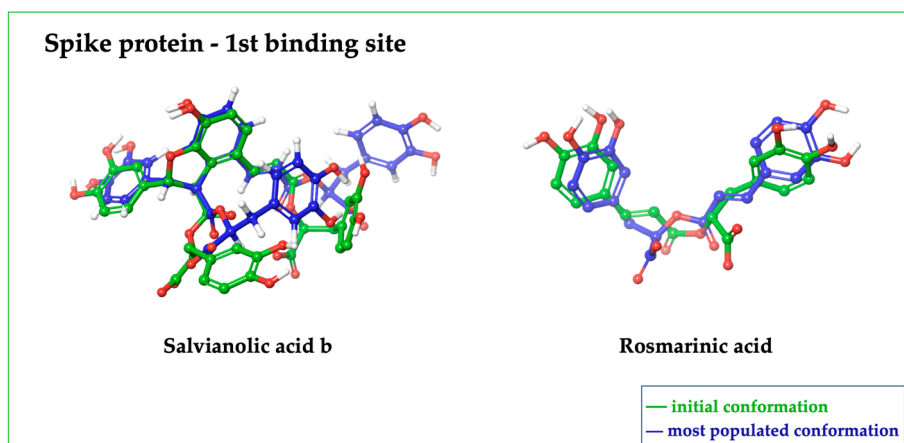

**Figure S8.** Superposition of the initial ligand conformation (green) derived from IFD for the first binding site of the S protein with the centroid deduced from clustering analysis of the MD simulations (blue).



## S protein - 2nd binding site

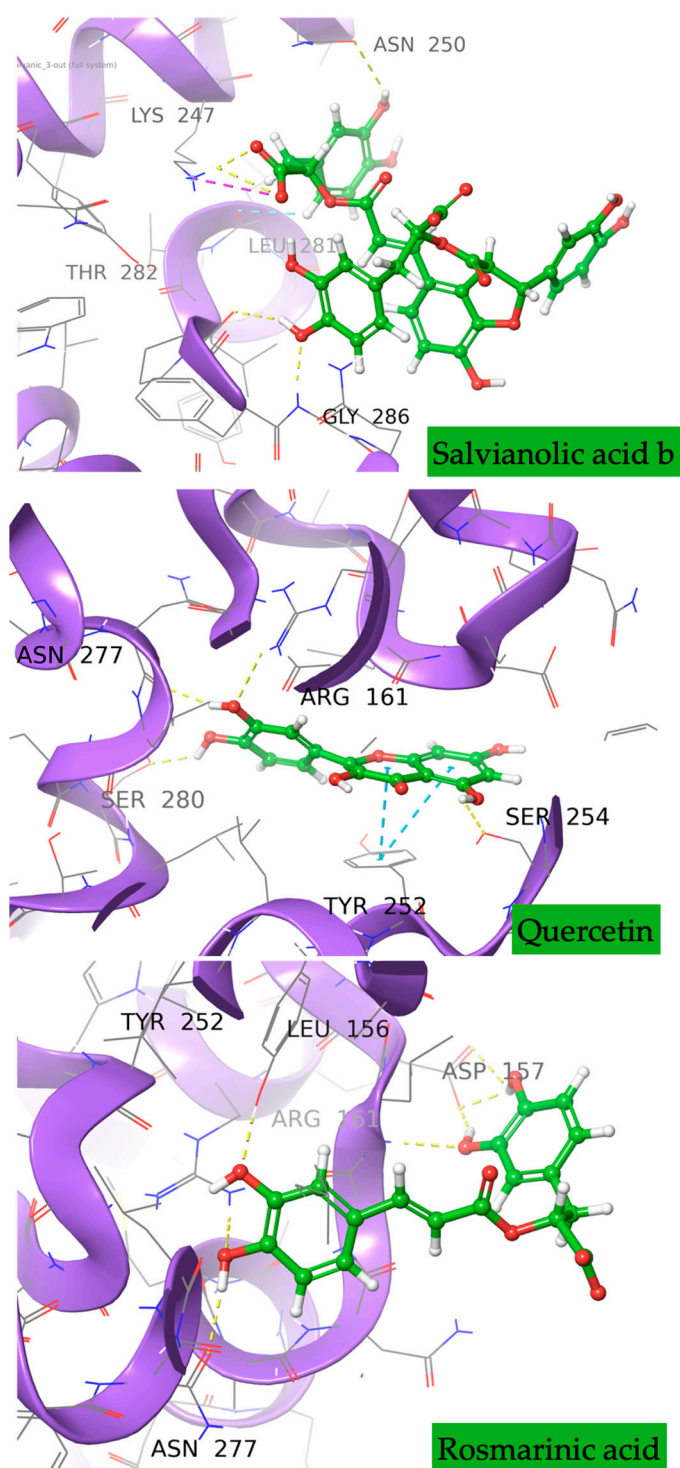

**Figure S9.** The predominant representative conformation of the S protein – natural products complexes obtained for the second binding site through clustering analysis. The centroid represents 26%, 40%, and 29% of the total simulation time for salvianolic acid b, quercetin and rosmarinic acid complexes, respectively.

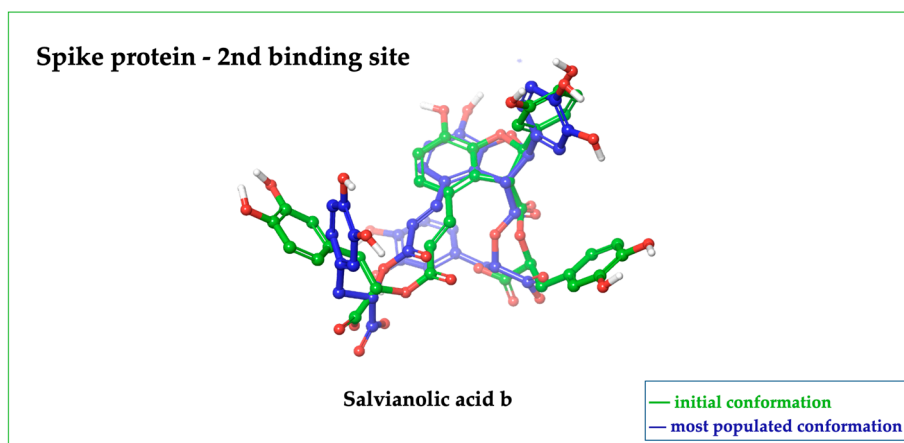

**Figure S10.** Superposition of the initial salvianolic acid conformation (green) derived from IFD for the second binding site of S protein with the centroid deduced from clustering analysis of the MD simulation (blue).

## S protein - 3rd binding site

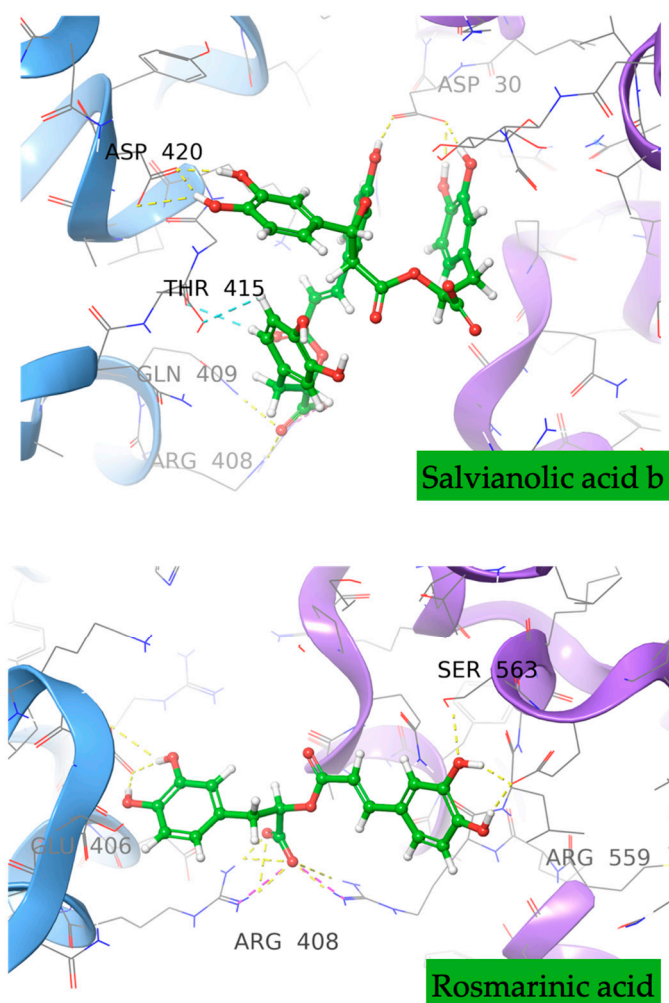

**Figure S11.** The predominant representative conformation of the S protein – natural products complexes obtained for the third binding through clustering analysis. The centroid represents 24% and 21% of the total simulation time for salvianolic acid b and rosmarinic acid complexes, respectively.



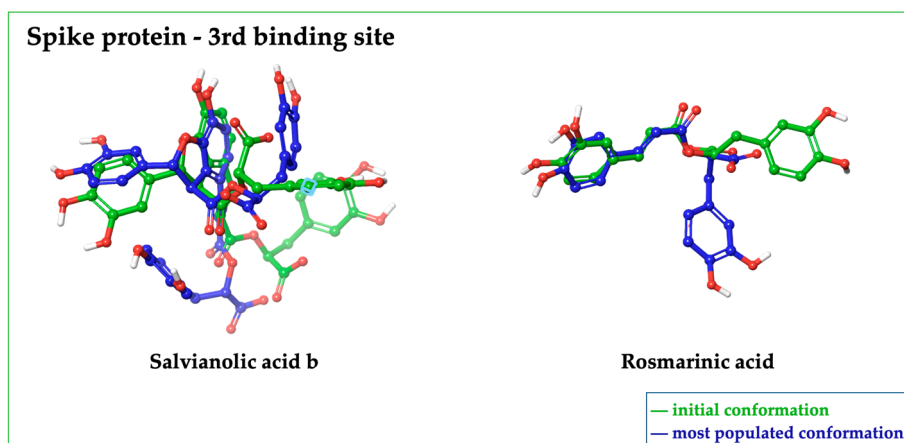

**Figure S12.** Superposition of the initial salvianolic acid b and rosmarinic acid conformation (green) derived from IFD for the 3rd binding site of S protein with the centroid conformation deduced from clustering analysis of the MD simulations (blue).

**Table S3.** The results of Induced Fit Docking (IFD) for the 116 compounds generated through a similarity search towards the binding site of Mpro (PDB ID: 6LU7) and the three separate binding sites of the S protein (PDB ID: 6M0J). The binding affinities are in units of kcal mol<sup>-1</sup>.

| Structure (CID) | Binding Affinity |               |       |                  |
|-----------------|------------------|---------------|-------|------------------|
|                 | Mpro             | Spike protein | ACE2  | New binding site |
| 2889            | -10.4            | -6.9          | -5.7  | -5.7             |
| 5099            | -13.3            | -11.5         | -     | -7.4             |
| 65035           | -12.0            | -9.5          | -7.7  | -6.6             |
| 125990          | -15.1            | -12.8         | -9.0  | -10.8            |
| 146723          | -11.3            | -7.1          | -6.7  | 5.4              |
| 390474          | -11.3            | -8.1          | -10.0 | -6.8             |
| 439589          | -13.3            | -14.7         | -8.1  | -7.4             |
| 502233          | -15.4            | -12.4         | -9.0  | -9.8             |
| 639655          | -13.3            | -11.5         | -4.8  | -5.9             |
| 3012090         | -12.3            | 12.4          | -8.0  | -7.2             |
| 5280343         | -12.0            | -10.9         | -7.7  | -5.6             |
| 5281614         | -11.0            | -10.1         | -9.5  | -4.6             |
| 5281692         | -11.2            | -10.3         | -9.3  | -6.3             |
| 5281792         | -11.8            | -13.2         | -7.7  | -6.6             |
| 5281793         | -14.0            | -14.4         | -7.7  | -10.7            |
| 5315614         | -13.2            | -13.4         | -8.2  | -5.6             |
| 5315615         | -13.3            | -14.7         | -4.8  | -5.9             |
| 5319772         | -11.5            | -13.6         | -4.8  | -7.4             |
| 5469426         | -11.3            | -7.7          | -6.3  | -5.4             |
| 6124301         | -13.5            | -10.6         | -8.2  | -7.5             |
| 6479915         | -12.3            | -8.9          | -8.0  | -5.7             |
| 6604740         | -12.8            | -7.9          | -8.1  | 7.4              |
| 9841799         | -12.0            | -9.7          | -6.4  | -6.3             |
| 9913656         | -13.9            | -9.7          | -9.0  | -8.0             |
| 10237698        | -13.8            | -8.9          | -8.7  | -8.1             |
| 10905440        | -12.5            | -9.1          | -6.7  | -7.1             |
| 10958864        | -10.3            | -8.5          | -5.9  | -6.7             |
| 10970786        | -11.5            | -9.6          | -6.1  | -7.4             |
| 11495229        | -8.7             | -2.1          | -     | -4.3             |
| 11640287        | -11.4            | -10.0         | -6.7  | -6.1             |
| 11953776        | -13.7            | -7.7          | -8.3  | -6.8             |

Table S3 continued

|           |       |       |       |       |
|-----------|-------|-------|-------|-------|
| 11956645  | -12.0 | -9.6  | -7.3  | -7.0  |
| 11956930  | -12.7 | -10.1 | -7.9  | -7.0  |
| 12305312  | -11.4 | -6.3  | -6.2  | -3.8  |
| 12309893  | -10.6 | -7.9  | -5.3  | -4.6  |
| 16082534  | -11.4 | -10.0 | -     | -6.1  |
| 21600688  | -11.0 | -6.3  | -7.2  | -7.0  |
| 24862412  | -14.6 | -14.3 | -8.3  | -8.0  |
| 24862413  | -14.0 | -13.2 | -7.0  | -9.4  |
| 24884282  | -10.6 | -9.1  | -6.1  | -5.2  |
| 25027450  | -15.1 | -13.1 | -9.0  | -7.5  |
| 25201609  | -9.6  | -10.9 | -6.7  | -8.2  |
| 25244691  | -9.6  | -10.9 | -6.7  | -8.2  |
| 25245604  | -12.4 | -13.0 | -8.7  | -7.7  |
| 29927682  | -15.4 | -9.7  | -8.2  | -7.5  |
| 44437692  | -12.9 | -12.3 | -8.5  | -6.0  |
| 44437696  | -13.0 | -11.0 | -8.9  | -6.7  |
| 45934363  | -12.8 | -7.9  | -     | -7.4  |
| 46782412  | -11.4 | -7.9  | -7.9  | -5.8  |
| 46906036  | -11.1 | -6.1  | -     | -5.5  |
| 49849859  | -11.2 | -10.6 | -8.6  | -5.3  |
| 49849860  | -11.7 | -10.1 | -8.1  | -4.7  |
| 51352598  | -13.7 | -12.3 | -7.9  | -10.9 |
| 53251006  | -9.6  | -7.5  | -6.6  | 6.8   |
| 54277438  | -12.7 | -10.1 | -8.2  | -7.3  |
| 54758660  | -10.7 | -7.6  | -9.3  | -5.1  |
| 57328179  | -12.3 | -8.9  | -8.0  | -5.6  |
| 59112128  | -11.0 | -5.5  | -5.5  | -6.4  |
| 59574960  | -9.3  | -6.2  | -8.4  | -5.7  |
| 69680617  | -13.8 | -8.9  | -8.1  | -8.1  |
| 71699430  | -8.3  | -9.3  | -7.0  | -6.1  |
| 71699506  | -9.1  | -7.9  | -6.2  | -7.0  |
| 71699507  | -10.2 | -8.4  | -9.2  | -6.3  |
| 73038698  | -12.6 | -10.0 | -7.6  | -6.1  |
| 73153047  | -12.0 | -9.6  | -7.7  | -6.9  |
| 74336856  | -13.7 | -10.5 | -9.6  | -10.9 |
| 74413535  | -11.4 | -8.5  | -6.9  | -6.7  |
| 74539584  | -15.1 | -7.0  | -10.9 | -10.0 |
| 76511959  | -11.5 | -9.6  | -8.4  | -7.4  |
| 88462991  | -10.7 | -6.9  | -7.2  | -6.1  |
| 91069955  | -11.2 | -6.1  | -7.2  | -5.9  |
| 91412498  | -11.5 | -6.1  | -6.3  | -4.4  |
| 101792073 | -11.5 | -6.3  | -6.1  | 5.1   |
| 101792074 | -12.0 | -6.3  | -7.8  | -5.4  |
| 124355854 | -14.4 | -9.4  | -6.2  | -9.0  |
| 124487414 | -14.2 | -9.5  | -7.1  | -9.2  |
| 129630417 | -11.2 | -9.0  | -6.0  | -4.7  |
| 129648032 | -11.9 | -8.3  | -7.3  | -5.3  |
| 129713895 | -10.4 | -     | -4.9  | -6.5  |
| 131676018 | -16.5 | -13.7 | -8.2  | 8.9   |
| 133561492 | -13.2 | -11.6 | -11.0 | -8.1  |
| 138535294 | -9.4  | -11.4 | -5.3  | -4.2  |
| 141240288 | -9.3  | -11.5 | -6.4  | -5.3  |
| 147170730 | -10.6 | -6.5  | -4.9  | -2.8  |
| 153409103 | -7.9  | -     | -5.1  | -4.5  |
| 153530089 | -11.6 | -7.3  | -4.0  | -7.6  |

Table S3 continued

|             |       |       |      |       |
|-------------|-------|-------|------|-------|
| 154074200   | -11.9 | -6.5  | -    | -5.0  |
| 156767820   | -10.8 | -     | -5.6 | -5.5  |
| 156767821   | -11.0 | -     | -    | -     |
| 156767823   | -10.4 | -5.9  | -7.6 | -6.9  |
| 162641822   | -11.0 | -6.5  | -7.2 | -6.8  |
| 162859050   | -11.6 | -8.4  | -8.6 | -6.0  |
| 162859051   | -12.9 | -8.4  | -8.6 | -6.0  |
| 162859053   | -12.7 | -10.1 | -6.5 | -7.0  |
| 162905073   | -12.6 | -7.5  | -4.4 | -6.7  |
| 162905074   | -13.7 | -7.7  | -4.4 | -6.8  |
| 163001353   | -11.5 | -9.6  | -8.4 | -7.4  |
| 163001354   | -11.1 | -10.2 | -    | -7.2  |
| 163342012   | -10.6 | -7.1  | -9.3 | -6.2  |
| 100985949n1 | -11.1 | -6.1  | -5.1 | -5.5  |
| 100985950n1 | -12.0 | -6.5  | -5.9 | 5.8   |
| 130345966n1 | -12.2 | -14.8 | -7.0 | -5.9  |
| 130345966n2 | -4.1  | -2.7  | -4.4 | -2.1  |
| 130367129n1 | -11.5 | -     | -5.6 | -5.5  |
| 131676119n1 | -12.0 | -12.8 | -7.4 | -5.5  |
| 131676119n2 | -12.0 | -2.5  | -3.3 | -3.2  |
| 142750760n1 | -13.8 | -12.9 | -8.6 | -10.0 |
| 159600901n1 | -10.8 | -7.8  | -9.5 | -5.8  |
| 16212154n1  | -12.0 | -     | -5.0 | -3.8  |
| 163332190n1 | -11.0 | -6.3  | -7.2 | -7.0  |
| 5284452n1   | -12.0 | -10.8 | -6.6 | -5.6  |
| 67304407n1  | -11.3 | -6.4  | -6.2 | -5.7  |
| 67304407n2  | -3.2  | -2.3  | -2.9 | -1.1  |
| 71311620n1  | -13.8 | -8.5  | -7.8 | -10.0 |
| 162859052   | -12.7 | -13.6 | -7.9 | -7.3  |

-: not docked
